# Supplementary material
Source: PubMed Central journal article supplement (PMC2890745)
Supplement: 0914925107_pnas.0914925107_SI.pdf [file 0914925107_pnas.0914925107_SI.pdf]

# Supporting Information

Rieder et al. 10.1073/pnas.0914925107

## SI Text

**SI Materials and Methods. RNA solid-phase synthesis.** 2'-*O*-TOM standard nucleoside phosphoramidites were obtained from GlenResearch or ChemGenes. 2'-*O*-*tert*-Butyldimethylsilyl-5'-*O*-(4,4'-dimethoxytrityl)-5-fluoro uridine phosphoramidite was purchased from ChemGenes. 5'-*O*-(4,4'-dimethoxytrityl)-2'-*O*-[(trisopropylsilyloxy)methyl-2-aminopurine (Ap) phosphoramidite was synthesized according to reference (1). All solid supports for RNA synthesis were purchased from GE Healthcare (Custom Primer Supports: riboC Ac 80, riboA 80, riboG 80, riboU 80).

Solid-phase RNA synthesis protocol: Detritylation (2.0 min): dichloroacetic acid/1,2-dichloroethane (4/96); coupling (3.0 min): phosphoramidites/acetonitrile (0.1 M  $\times$  120  $\mu$ L) were activated by benzylthiotetrazole/acetonitrile (0.3 M  $\times$  360  $\mu$ L); capping (3  $\times$  0.4 min): A: Ac<sub>2</sub>O/sym-collidine/acetonitrile (20/30/50), B: 4-(dimethylamino)pyridine/acetonitrile (0.5 M), A/B = 1/1; oxidation (1.0 min): I<sub>2</sub> (10 mM) in acetonitrile/sym-collidine/H<sub>2</sub>O (10/1/5). Acetonitrile, solutions of amidites and tetrazole were dried over activated molecular sieves overnight.

**Enzymatic ligation.** Enzymatic ligations were performed along the lines described in reference (2). The use of T4 DNA ligase requires a double-stranded ternary substrate formed by a 5'-phosphorylated RNA donor, a single stranded RNA acceptor with a free 3'-OH group, and a splint oligonucleotide. The following fragments were used: 5'-AGA UGU GCU AGC AAA ACC AUC UUU AAA AAA CU(Ap) G-3' (acceptor strand 34 nt RNA), 5'-p ACU UGG GGU GCA AGU CCC CUU UUU UAU p-3' (donor strand for the 61 nt RNA variant), 5'-p ACU UGG GGU GCA AGU CCC CUU UUU UAU UGC UUA AAU p-3' (donor strand for the 70 nt RNA variant); 5'-ACT TGC ACC CCA AGT CTA GTT TTT TAA AGA-3' (splint DNA). For optimization of ligation conditions, ligation reactions were first performed on an analytical scale (0.2 to 1 nmol) with different lengths of DNA splint before proceeding on preparative scale (20 nmol). T4 DNA ligase was purchased from *Fermentas* 5 U/ $\mu$ L. Optimal ligation conditions: 10  $\mu$ M for each RNA fragment, 12  $\mu$ M for the 30 nt DNA splint and a final ligase concentration of 0.5 U/ $\mu$ L in a total volume of 2 ml; 22 h at 39°C.

Analysis of the ligation reaction and purification of the ligation products were performed by anion exchange chromatography. LC ESI MS was used for characterization of the HPLC-purified RNA. The yield of the full-length preQ<sub>1</sub> riboswitch was >40% after purification by anion exchange chromatography (61 nt: 10.5 nmol, OD<sup>260</sup> ~ 7.2; 70 nt: 9.0 nmol, OD<sup>260</sup> ~ 7.2).

**Native gel shift assay.** RNA dimerization behavior and ligand binding were investigated by a native gel shift assay with unlabeled and <sup>32</sup>P-labeled RNA (approximately 25,000 cpm for each lane). The RNA samples in absence or presence of the ligand preQ<sub>1</sub> (3) in 10  $\mu$ L loading buffer (50 mM KMOPS pH 7.0, 100 mM KCl, 3 mM MgCl<sub>2</sub>, and 5% glycerol) were prepared in two different ways: (A) **Heat shock (*hs*)**: the sample was heated to 90°C for 1 min, then rapidly cooled in an ice bath and equilibrated to room temperature for 15 min. (B) **Annealing (*an*)**: the sample was heated to 90°C for 1 min, then incubated for 15 min at room temperature. The reaction mixture was then resolved on a 12% polyacrylamide gel (C = 2.5%). The nondenaturing gel was run for approximately 5 h (approximately 180 V at 4°C or room temperature). The unlabeled RNA and RNA-ligand complex were visualized by methylene blue staining (staining solution: methylene blue 0.02% in H<sub>2</sub>O). <sup>32</sup>P-labeled RNA was analyzed

using a phosphor imaging screen. Final concentrations of RNA and preQ<sub>1</sub> were as indicated in the corresponding figure captions.

**Chemical and enzymatic probing.** Lead(II)-induced cleavages and enzymatic probing were used to study the secondary structure of the different RNA sequences either free or in complex with preQ<sub>1</sub>. For detection of the cleavages 5' end-labeled RNA was chosen (4–7).

**5' End-labeling of RNA.** RNA (15 pmol) was 5' end-labeled using 3  $\mu$ L of [ $\gamma$ -<sup>32</sup>P]ATP (6000 Ci/mmol, 500  $\mu$ Ci), 1  $\mu$ L T4 polynucleotide kinase PNK (*Fermentas*—10 U/ $\mu$ L), 8  $\mu$ L H<sub>2</sub>O, 1.5  $\mu$ L 10  $\times$  PNK buffer (0.5 M Tris-HCl pH 7.6, 0.1 M MgCl<sub>2</sub>, 50 mM DTT, 1 mM spermidine, and 1 mM EDTA). The reaction was incubated for 30 min at 37°C and then stopped with 1  $\mu$ L 140 mM EDTA. The labeled RNA was purified by electrophoresis on a 8% polyacrylamide gel (C = 3.6%; 7 M urea). After PAGE purification, labeled RNA was eluted from gel slices with 200  $\mu$ L of 0.2 M NaCl overnight at 4°C. The RNA was then precipitated and diluted in 20  $\mu$ L water. The activity of the RNA was measured on a scintillation counter.

**Lead(II)-induced cleavages.** All reactions were performed in a total volume of 20  $\mu$ L. Labeled RNA (1  $\mu$ L, approximately 50,000 cpm) and unlabeled RNA (3  $\mu$ L, 45 pmol) were heated to 90°C for one minute, and then rapidly cooled in an ice bath. The RNA samples were renatured in the presence of 13  $\mu$ L water and 2  $\mu$ L 10  $\times$  buffer (0.5 M KMOPS pH 7.0, 1 M KCl, 20 mM Mg<sup>2+</sup>). The reactions were performed without or with 12.5  $\mu$ M preQ<sub>1</sub> (1  $\mu$ L of 250  $\mu$ M preQ<sub>1</sub> stock solution). Hydrolysis was initiated with 2  $\mu$ L of a freshly prepared 10 mM (20 mM) aqueous lead(II)-acetate solution (1–2 mM final concentration); lead(II)-acetate trihydrate purchased from Sigma-Aldrich) for 15 min at 20°C. The reactions were stopped by adding 6  $\mu$ L of 140 mM EDTA, precipitated with 70  $\mu$ L of 0.3 mM NaOAc in 80% ethanol and 1  $\mu$ L glycogen (10  $\mu$ g/ $\mu$ L) for 20 min at –20°C and centrifuged for 20 min at 4°C at 13,000 rpm.

**Enzymatic probing.** All reactions were performed in a total volume of 20  $\mu$ L. Appropriate dilutions of enzymes were prepared in dilution buffer (50 mM Tris-HCl pH 7.0, 50% glycerol) just before use. The reactions were performed without or with 12.5  $\mu$ M preQ<sub>1</sub> (1  $\mu$ L of 250  $\mu$ M preQ<sub>1</sub> stock solution). *RNase S1*: 2  $\mu$ L *S1* (10 U/ $\mu$ L, *Promega*—95 U/ $\mu$ L); 2  $\mu$ L of (0.5 M KMOPS pH 7.0, 1 M KCl, 100 mM MgCl<sub>2</sub>, 10 mM ZnCl<sub>2</sub>); 10 min at 20°C (*RNase S1* is specific for unpaired regions). *RNase V1*: 2  $\mu$ L *V1* (0.01 or 0.04 U/ $\mu$ L, *Ambion*—0.1 U/ $\mu$ L); 2  $\mu$ L of 10  $\times$  reaction buffer (0.5 M KMOPS pH 7.0, 1 M KCl, 100 mM MgCl<sub>2</sub>); 10 min at 20°C (*RNase V1* is specific for double-stranded regions). The reactions were stopped and precipitated by adding 30  $\mu$ L of a commercially available precipitation/inactivation buffer (*Ambion*), 70  $\mu$ L of 0.3 mM NaOAc in 80% ethanol and 1  $\mu$ L glycogen (10  $\mu$ g/ $\mu$ L).

**Incubation control and ladder for cleavage assignments.** Incubation controls C in the absence or presence of preQ<sub>1</sub> were always performed to detect non specific cleavages. In these controls, lead(II)-acetate or the enzyme were replaced by nanopure H<sub>2</sub>O. The *RNase T1* ladder was carried out with labeled RNA (1  $\mu$ L, approximately 50,000 cpm), unlabeled RNA (3  $\mu$ L, 45 pmol), 6  $\mu$ L of RNA loading buffer (0.02% xylene cyanol, 0.02% bromophenol blue in 8 M urea—preincubation at 50°C for 5 min) and 2  $\mu$ L of *RNase T1* (0.5 U/ $\mu$ L, *Fermentas*—1000 U/ $\mu$ L) for 10 min at 50°C. The T1 reaction was directly loaded on the gel. For the alkaline ladder labeled RNA (2  $\mu$ L, ~100,000 cpm) and unlabeled RNA (6  $\mu$ L, 90 pmol) were

incubated at 90 °C for 15 min in the presence of 23  $\mu\text{L}$  of ladder buffer (100 mM  $\text{Na}_2\text{CO}_3$ , 100 mM  $\text{Na}_2\text{CO}_3$ , pH 9.0). The alkaline reaction was stopped and precipitated by adding 115  $\mu\text{L}$  of 0.3 mM NaOAc in 80% ethanol and 1  $\mu\text{L}$  glycogen (10  $\mu\text{g}/\mu\text{L}$ ).

The pellets were washed with 70% cold ethanol and dissolved in 8  $\mu\text{L}$  (C and H in 10  $\mu\text{L}$ ) of loading buffer (0.02% xylene cyanol, 0.02% bromophenol blue in 8 M urea). The end-labeled RNA fragments were sized by electrophoresis on a 15% polyacrylamide gel (C = 3.3%; 7 M urea; 1  $\times$  TBE; approximately 80 min at 40 W). The 15% PAGE was transferred without drying on a plastic film and analyzed using a phosphor imaging screen (overnight exposure at  $-20^\circ\text{C}$ ).

- Höbartner C (2005) Chemically modified RNA—The effect of nucleobase alkylations on RNA secondary structures and the synthesis of 2'-methylseleno derivatized RNA. PhD thesis (University of Innsbruck, Innsbruck).
- Lang K, Micura R (2008) The preparation of site-specifically modified riboswitch domains as an example for enzymatic ligation of chemically synthesized RNA fragments. *Nat Protoc* 3:1457–1466.
- Klepper F, Polborn K, Carell T (2005) Robust synthesis and crystal-structure analysis of 7-cyano-7-deazaguanine (PreQ<sub>0</sub> base) and 7-aminomethyl-7-deazaguanine (PreQ<sub>1</sub> base). *Helv Chim Acta* 88:2610–2616.

**Fluorescence spectroscopy—Binding affinities.** Data were fit using a  $K_D$  quadratic equation solution for 1:1 stoichiometry.

$$\frac{F - F_0}{F_f - F_0} = (K_D + [\text{preQ}_1]_{\text{tot}} + [\text{RNA}]_{\text{tot}}) + \{(K_D + [\text{preQ}_1]_{\text{tot}} + [\text{RNA}]_{\text{tot}})^2 - 4[\text{preQ}_1]_{\text{tot}}[\text{RNA}]_{\text{tot}}\}^{-1/2}$$

$F_0$  (initial fluorescence),  $F_f$  (final fluorescence),  $[\text{RNA}]_{\text{tot}}$  (total Ap-RNA concentration),  $[\text{preQ}_1]_{\text{tot}}$  (total preQ<sub>1</sub> concentration for each titration step).

- Polacek N, Barta A (1998) Metal ion probing of rRNAs: Evidence for evolutionarily conserved divalent cation binding pockets. *RNA* 4:1282–1294.
- Brown RS, Dewan JC, Klug A (1985) Crystallographic and biochemical investigation of the lead(II)-catalyzed hydrolysis of yeast phenylalanine tRNA. *Biochemistry* 24:4785–4801.
- Brown RS, Hingerty BE, Dewan JC, Klug A (1983) Pb(II)-catalysed cleavage of the sugar-phosphate backbone of yeast tRNA<sup>phe</sup>—Implications for lead toxicity and self-splicing RNA. *Nature* 303:543–546.
- Huntzinger E, Winter F, Ehresmann C, Romby P (2005) *Handbook of RNA Biochemistry*, eds Hartmann RK, Bindereif A, Schön A, Westhof E (Wiley, Weinheim), Vol 1, pp 39–55.

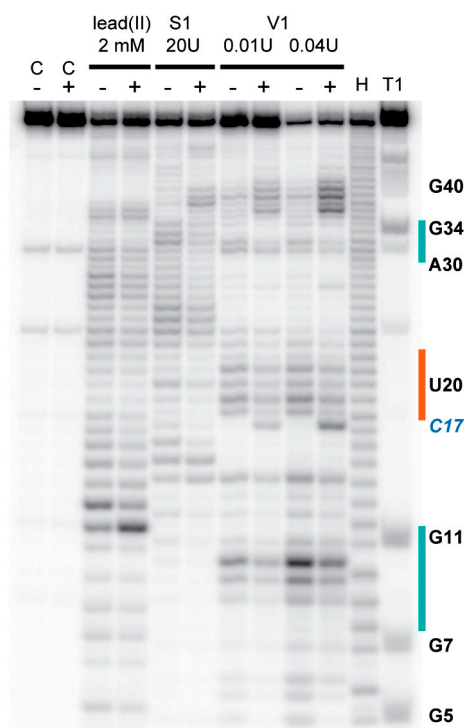

**Fig. S1.** Chemical and enzymatic probing of a full-length riboswitch domain (54 nt) by lead(II)-acetate, RNase S1 and RNase V1 in the absence (–) and presence (+) of a 4-fold excess of preQ<sub>1</sub>. C designates control reactions without and with preQ<sub>1</sub>. T1 and H designate RNase T1 and alkaline hydrolysis ladders, respectively. For further details see *SI Materials and Methods*.
